# Supplementary material for: MD simulations and QM/MM calculations reveal the key mechanistic elements which are responsible for the efficient C–H amination reaction performed by a bioengineered P450 enzyme
Source: Royal Society of Chemistry journal article supplement (doi:10.1039/d1sc03489h), 2021-01-01
Supplement: d1sc03489h1.pdf [file d1sc03489h1.pdf]

## Supporting Information

### **MD Simulations and QM/MM Calculations Reveal the Key Mechanistic Elements which are Responsible for the Efficient C-H Amination Reaction Performed by a Bioengineered P450 Enzyme**

Surajit Kalita,<sup>1</sup> Sason Shaik<sup>2\*</sup> and Kshatresh Dutta Dubey<sup>1\*</sup>

<sup>1</sup>Department of Chemistry and Center for Informatics, School of Natural Sciences, Shiv Nadar University, Dadri, Gautam Buddha Nagar, Uttar Pradesh, 201314, India.

<sup>2</sup> Institute of Chemistry, The Hebrew University of Jerusalem, Edmond J Safra Campus, Givat Ram, Jerusalem, 9140401 Israel.

#### **Table of Content:**

|                                                                                                     |         |
|-----------------------------------------------------------------------------------------------------|---------|
| S.1. Impact of protonation at proximal serine in reactivity                                         | S2-S3   |
| Figure S2: DFT optimization of ferrous heme complex                                                 | S4      |
| Figure S3: DFT Optimization of iron nitrenoid complex                                               | S4      |
| Figure S4: Results for replica simulation of <b>variant 2</b>                                       | S5      |
| Figure S5: Results for substrate upside-down simulation of <b>variant 2</b>                         | S6      |
| Figure S6: Testing the enantioselectivity of non-selective <b>variant 1</b>                         | S7      |
| Figure S7: Results for pro-S hydrogen abstraction and comparison with pro-R hydrogen                | S8      |
| Figure S8: QM/MM optimized transition state geometry                                                | S8      |
| Figure S9: Distance correlation plots between ligand and other enzyme residues                      | S9      |
| Figure S10: QM/MM optimized geometry of cysteine ligated ferrous heme complex                       | S9      |
| Figure S11: QM/MM PES results of cysteine ligated ferrous heme complex for iron nitrenoid formation | S10     |
| QM coordinates of the CH amination reaction                                                         | S11-S18 |
| QM coordinates of the Iron Nitrenoid formation reaction                                             | S18-S22 |

**S.1. Impact of protonation at proximal serine in reactivity:** The protonation state of the serine was initially considered based on the catalytic cycle described by Arnold and coworkers in their article for intermolecular C-H amination reaction where they have considered it as protonated serine. We, however, performed QM/MM scanning and QM-only DFT study to determine the correct protonation state of proximal serine residue. Our study shows that the protonated serine is more favorable than the deprotonated one both energetically as well as structurally. In the QM/MM study, we have taken the protonated reactant complex (RC) and performed potential energy surface scanning to deprotonate the serine oxygen. During this scanning, we obtained that the energy required to break the O-H bond is high and it climbs up to ~23 kcal/mol. The exact energy barrier is uncertain as the proton starts to interact with the porphyrin nitrogen and distorts the porphyrin arrangement. This was further substantiated by DFT only study. Therefore, a use of deprotonated serine could be doubtful.

It is well known that push-pull effects along the distal and proximal axis of iron regulate the reactivity of heme complex (Denisov et. al). Therefore, protonation (or deprotonation) of the serine could play the same decisive role in the reactivity of P411. In the protonated serine most of the Fe electrons are available along the distal axis (Fe-N) making it more reactive. On the other hand, in the deprotonated serine the iron d-electrons are delocalized along Fe-O linkage making the deprotonated species less reactive. This could also be justified by comparing the Fe-N and Fe-O bond lengths in protonated and deprotonated serine complex. In the deprotonated axial serine, the Fe-O bond length becomes too short and thereby it causes elongation of the Fe-N bond (trans effect). This effect is much less significant when the axial ligand is the protonated serine.

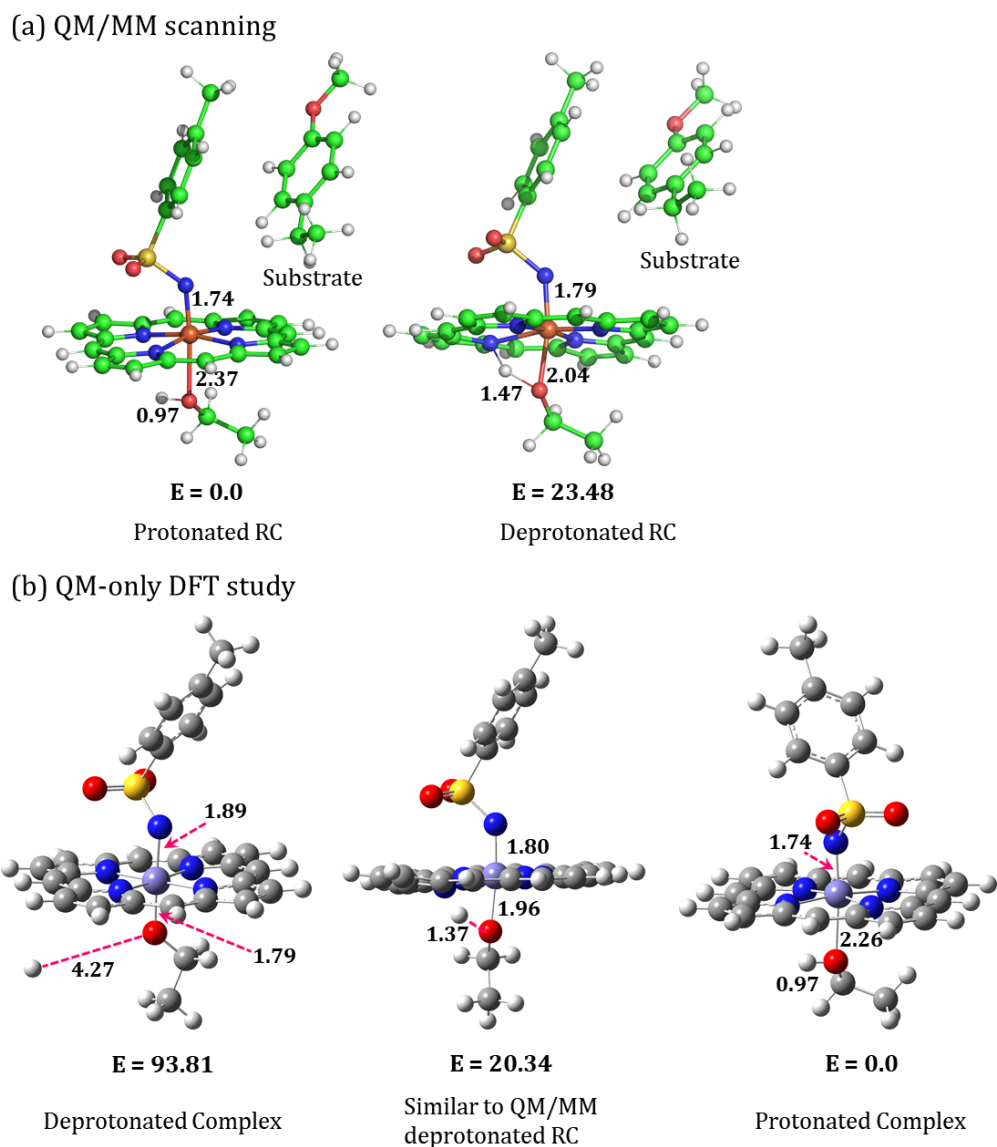

Figure S1: (a) Results of QM/MM potential energy surface scanning that shows two different protonation state of the reactant complex (RC), i.e., protonated, and deprotonated. In deprotonated RC, proton shows the probable interaction with porphyrin nitrogen atom. (b) QM-only DFT studies reveal three distinct geometries, i.e., protonated, completely deprotonated and a geometry similar to the QM/MM deprotonated RC both energetically as well as structurally. Note that distances and energies are given in Å and kcal/mol unit for both results.

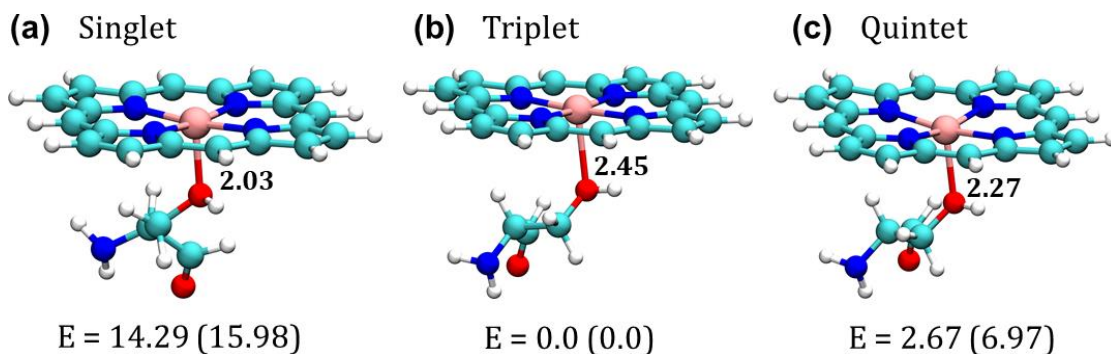

Figure S2: DFT optimization of ferrous heme complex at ground state for three different spin multiplicities. Optimized bond parameters are in Å unit. The relative energies are shown in kcal/mol. The values in parentheses are single-point energies at an extensive basis set (def2-TZVP).

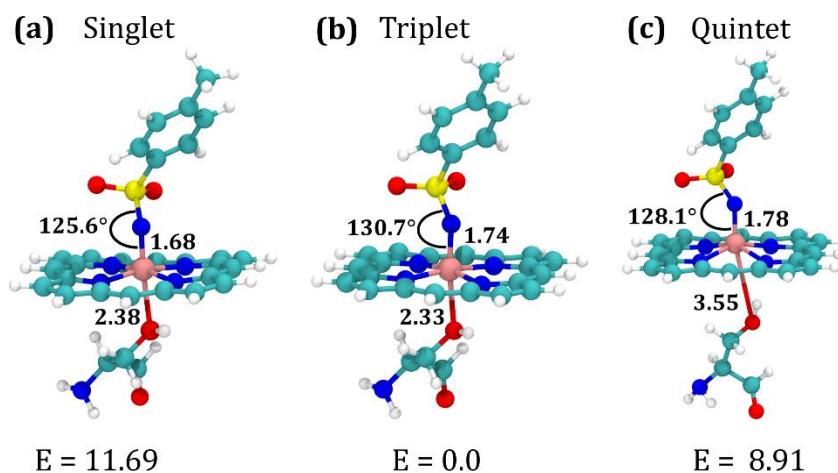

Figure S3: The optimized geometry of iron nitrenoid at different multiplicities. The energy values are evaluated using single-point calculation on optimized geometry using the larger basis set def2-TZVP. All the energies are reported in kcal/mol.

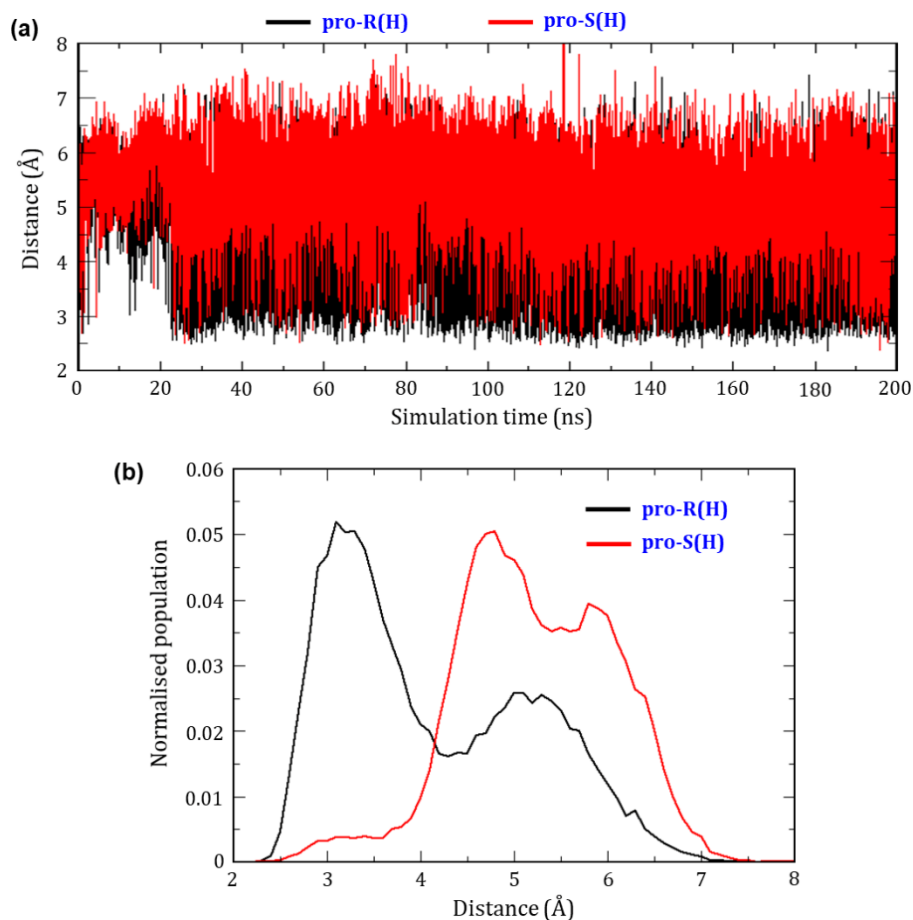

Figure S4: (a) Evolution of distance with time between the pro-R and pro-S hydrogens with the reactive nitrogen (N1) for entire 200 ns replica **variant 2** simulation. (b) The Boltzmann population distribution plot corresponds to distance plots between the pro-R and pro-S hydrogens with the reactive nitrogen (N1) over the entire 200 ns simulation. Note that black and red represent pro-R and pro-S hydrogens for both distance and population distribution plots respectively.

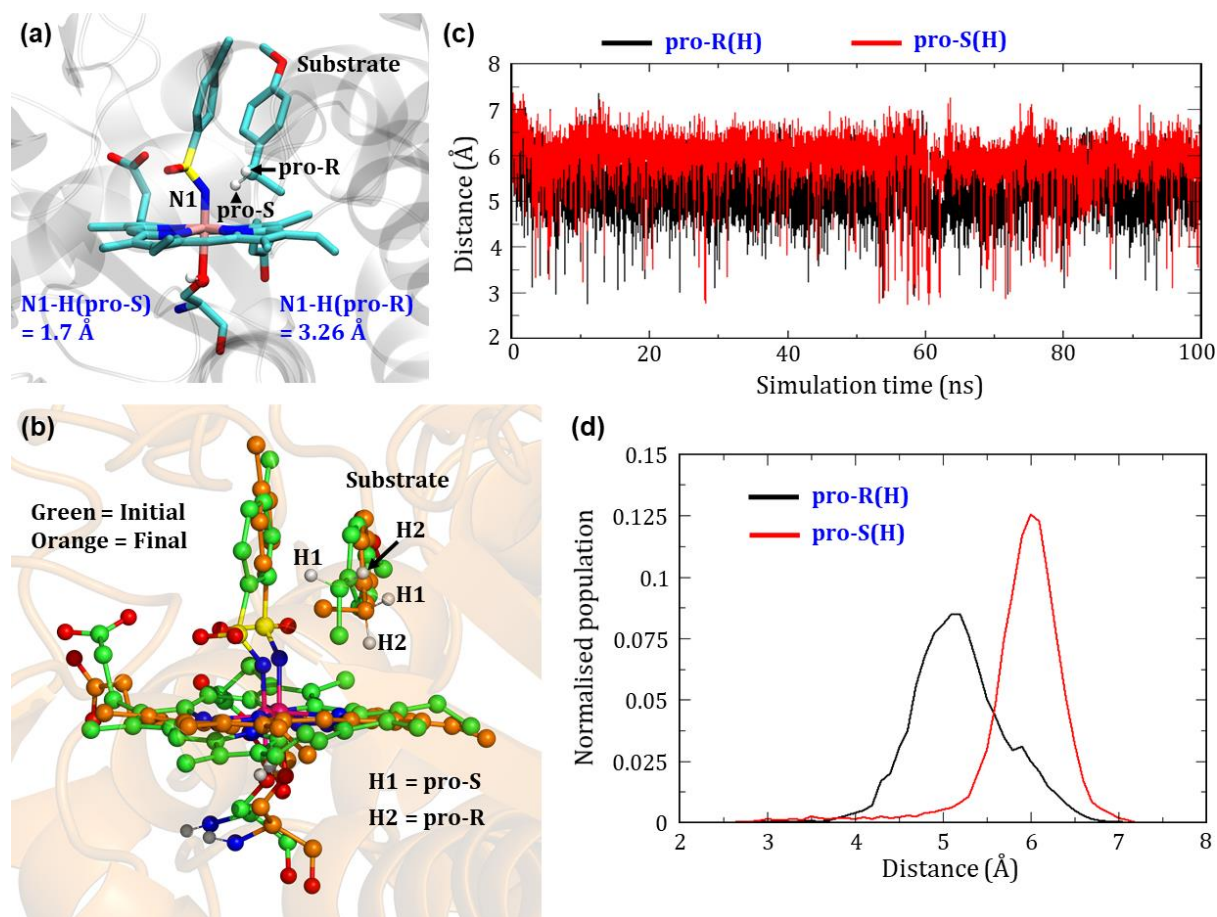

Figure S5: (a) Substrate docked geometry at which the pro-S hydrogen is facing the reactive nitrogen (N1) in **variant 2**. (b) Superimposed image of the snapshots considered from before and after production MD run. Here, green and orange represent the initial and final snapshots. The H1 and H2 hydrogens describe the pro(S) and pro(R) respectively. (c) Distance plots between reactive nitrogen (N1) and pro-R (black) as well as pro-S (red) hydrogens. (d) Boltzmann distribution plot corresponding to the above distance plots with identical color classification.

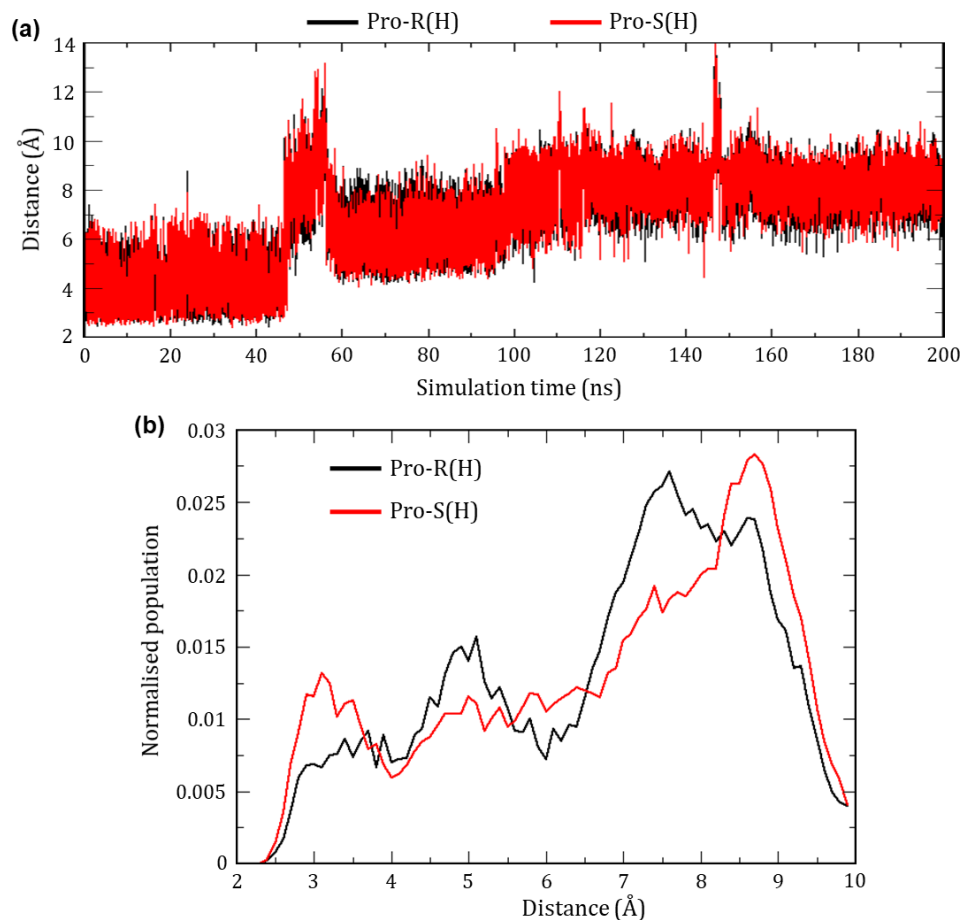

Figure S6: (a) Evolution of distance with time between the pro-R and pro-S hydrogens with the reactive nitrogen (N1) for entire 200 ns replica **variant 1** simulation. (b) The Boltzmann population distribution plot corresponds to distance plots between the pro-R and pro-S hydrogens with the reactive nitrogen (N1) over the entire 200 ns simulation. Note that black and red represent pro-R and pro-S hydrogens for both distance and population distribution plots respectively.

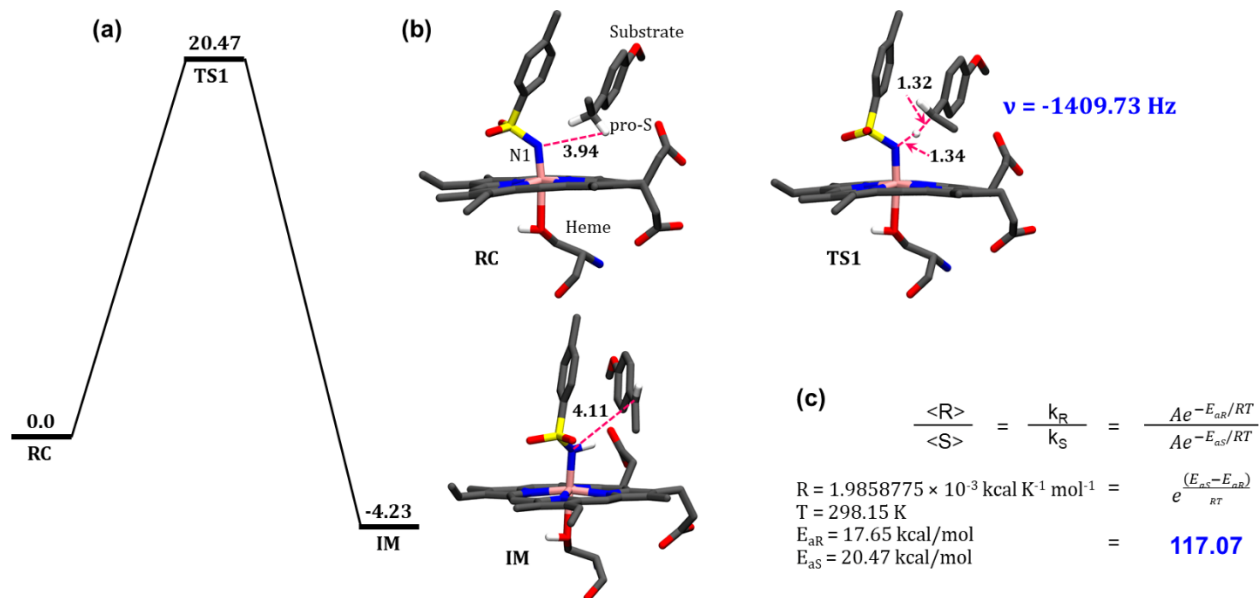

Figure S7: (a) Energy profile diagram for the abstraction of pro-S hydrogen obtained from the PES scanning. Energies are relative to RC and reported in kcal/mol unit. All the energies are Grimme dispersion (GD-3) and ZPE corrected in the same level of theory (ub3lyp/def2-SVP). (b) The key geometries RC, TS, and IM obtained from the PES scanning. All the distances are in Å unit. (c) Arrhenius equation shows the comparative rate constant data.

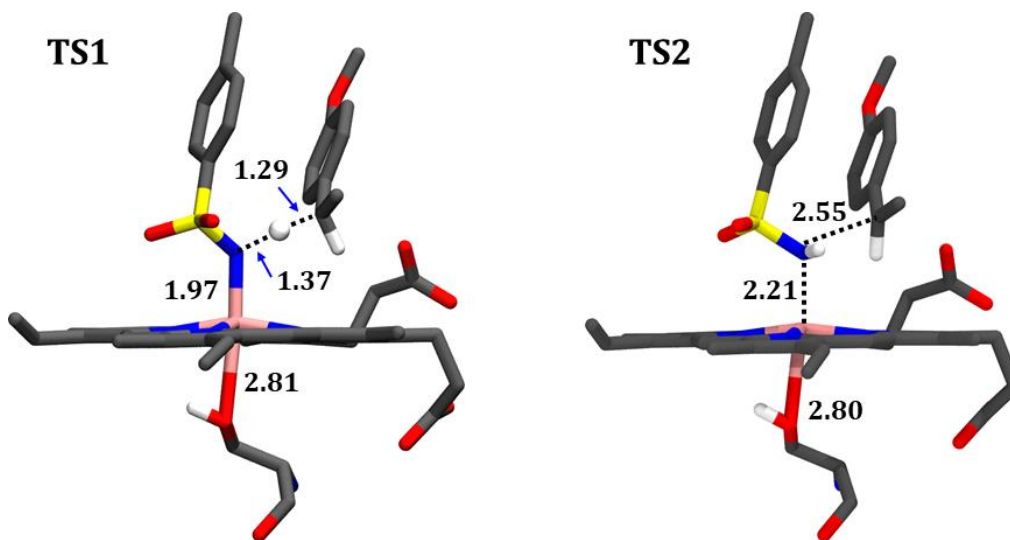

Figure S8: QM/MM optimized transition state geometry for C-H amination reaction; where TS1 and TS2 denote hydrogen abstraction and rebound process, respectively. Bond parameters are in Å unit.



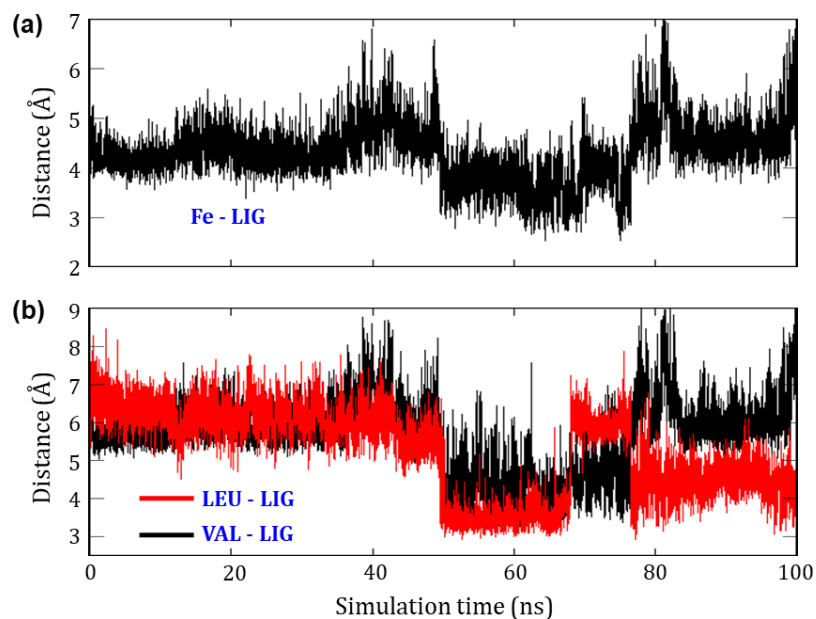

Figure S9: a) The distance between N1 of tosyl azide (TAZ) and Fe of heme porphyrin. (b) Black and red plots show the distance between V328 and L263 with TAZ, respectively.

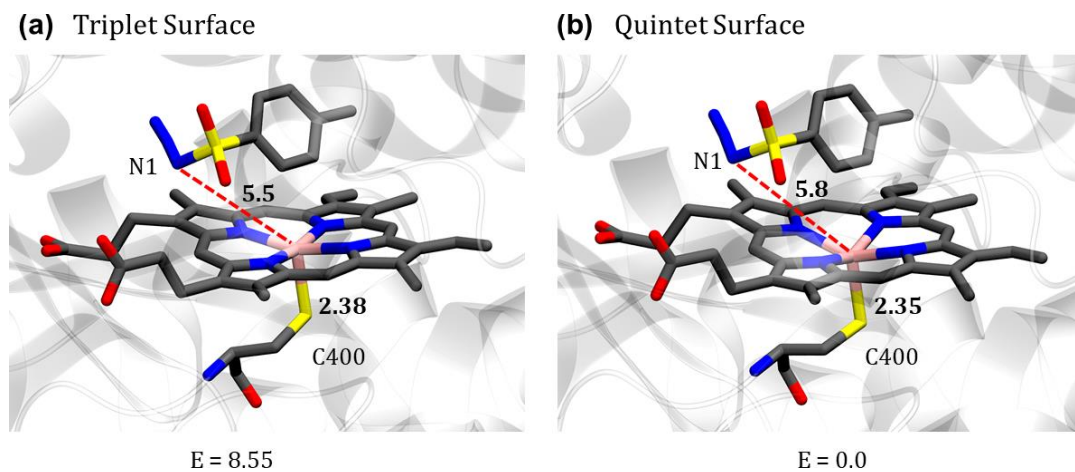

Figure S10: QM/MM optimized geometry of a representative MD snapshot and their relative energy in kcal/mol at (a) Triplet and (b) Quintet surface. The bond parameters are in Å unit.

**(a)** Triplet Surface

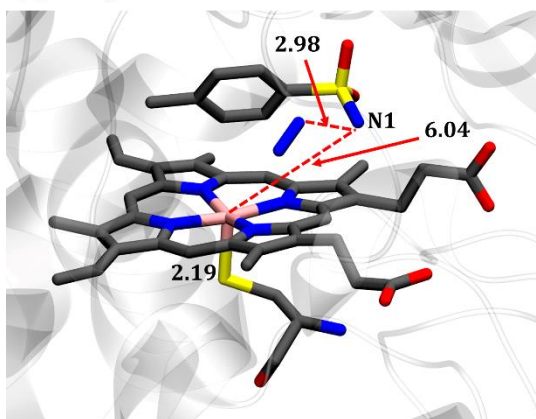

**(b)** Quintet Surface

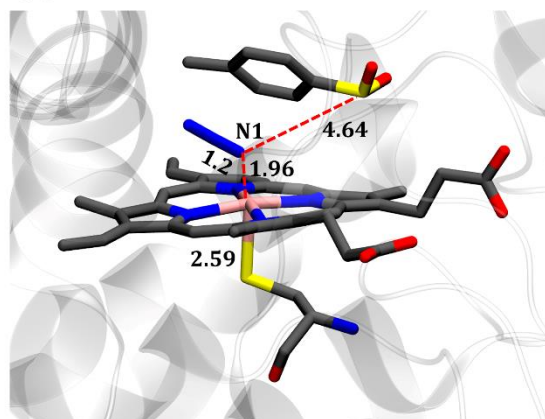

Figure S11: Results for the potential energy surface scanning for the formation of iron nitrenoid in the axial serine to cysteine mutated P411 system. It has been performed in both triplet and quintet surface. Substrate molecule is tosyl azide. All the bond parameters are shown in Å unit.

## Coordinates of atoms in the QM region of the QM/MM calculations for different complex

### QM coordinates of the CH amination reaction

#### RC

C 47.9180151 36.6804658 42.5928787  
H 47.7605838 36.8832230 43.6664481  
C 46.9561756 37.5411168 41.7875737  
H 47.2384423 38.5994843 41.8880274  
H 47.0069340 37.2849050 40.7159602  
O 45.5875116 37.3700569 42.2246072  
H 45.0104861 37.6695138 41.5066237  
C 47.1403343 38.8166584 45.7588590  
C 46.0482756 41.3366137 41.7711375  
C 42.0560091 38.6480394 41.2112355  
C 43.0861298 36.2279880 45.2667291  
C 47.2216116 39.7038638 44.6896144  
C 48.3611728 40.5583190 44.4207784  
C 48.0552690 41.2860814 43.3037952  
C 46.7286681 40.8642134 42.8916291  
C 44.8333971 40.8538520 41.2936895  
C 44.1645439 41.3503750 40.1100759  
C 43.0278897 40.6056838 39.9514340  
C 43.0164968 39.6373145 41.0298880  
C 41.9780570 37.7536705 42.2724859  
C 40.9140244 36.7812392 42.4529311  
C 41.2027588 36.0974987 43.6015942  
C 42.4375153 36.6651992 44.1183360  
C 44.2715939 36.7441650 45.7834412

C 44.9181259 36.2662995 46.9899320  
C 46.0617392 37.0042041 47.1357317  
C 46.1028539 37.9264830 46.0153913  
N 46.2522097 39.8911316 43.7371352  
N 44.1248505 39.8022163 41.8311342  
N 42.8918330 37.6646170 43.2915598  
N 45.0021977 37.7542363 45.2146943  
H 47.9778891 38.8053738 46.4539726  
H 46.5139474 42.1412442 41.2015431  
H 41.2754202 38.5715315 40.4626669  
H 42.6284224 35.4089175 45.8201137  
Fe 44.4541128 38.9195428 43.6230639  
C 41.0565230 42.5923412 47.7585789  
C 41.2203906 41.6470690 46.7420903  
C 41.8775036 42.0061450 45.5613680  
C 42.3349137 43.3184509 45.3819044  
C 42.1701956 44.2505148 46.4065142  
C 41.5387315 43.9060205 47.6177840  
C 41.3587220 44.9362928 48.7093386  
S 42.0416942 40.8100203 44.2230367  
O 40.9979973 39.7893769 44.3948763  
O 42.1006381 41.5894322 42.9746062  
N 43.5386719 40.0985808 44.5231089  
H 42.2728977 45.5357578 48.8459289  
H 40.5443579 45.6375188 48.4591870  
H 41.1036507 44.4675950 49.6711199

|   |            |            |            |            |            |            |            |
|---|------------|------------|------------|------------|------------|------------|------------|
| C | 44.9227451 | 43.2490162 | 48.6301557 | H          | 44.5432626 | 35.4864137 | 47.6527464 |
| C | 44.6398658 | 41.8961341 | 48.4850057 | H          | 46.7754980 | 36.9343180 | 47.9565432 |
| C | 44.4346560 | 41.0608003 | 49.6008103 | H          | 48.9395582 | 36.9676104 | 42.3437505 |
| C | 44.5315519 | 41.6458969 | 50.8676362 | H          | 47.6778256 | 35.6328945 | 42.4113009 |
| C | 44.8049633 | 43.0124756 | 51.0346225 | H          | 40.5311502 | 42.2884547 | 48.6639537 |
| C | 44.9969055 | 43.8216365 | 49.9100924 | H          | 40.8044275 | 40.6460971 | 46.8565333 |
| O | 45.2417447 | 45.1675918 | 49.9585978 | H          | 42.7960339 | 43.6230747 | 44.4424154 |
| C | 45.4011459 | 45.7963999 | 51.2189150 | H          | 42.5412421 | 45.2639233 | 46.2535611 |
| C | 44.1203360 | 39.5930266 | 49.3740736 |            |            |            |            |
| C | 43.6273998 | 38.7973575 | 50.5798978 | <b>TS1</b> |            |            |            |
| H | 45.0566069 | 43.8897842 | 47.7553203 | C          | 48.0073426 | 36.5786164 | 42.5572041 |
| H | 44.5585241 | 41.4766646 | 47.4776490 | H          | 47.8461587 | 36.7544615 | 43.6359923 |
| H | 44.3855720 | 41.0379649 | 51.7629302 | C          | 47.0068011 | 37.4236416 | 41.7813205 |
| H | 44.8554790 | 43.4282050 | 52.0410749 | H          | 47.2293212 | 38.4893270 | 41.9618626 |
| H | 44.4818283 | 45.7268757 | 51.8242636 | H          | 47.1120065 | 37.2430211 | 40.6950291 |
| H | 46.2405855 | 45.3652155 | 51.7867675 | O          | 45.6649286 | 37.1277728 | 42.1849438 |
| H | 45.6164287 | 46.8540387 | 51.0201094 | H          | 45.0678139 | 37.7182225 | 41.7030708 |
| H | 45.0184778 | 39.1020062 | 48.9565357 | C          | 47.2972641 | 38.5569018 | 46.0219834 |
| H | 43.3692688 | 39.5252920 | 48.5674546 | C          | 46.1446734 | 41.2806067 | 42.1884813 |
| H | 42.6890585 | 39.2067995 | 50.9833890 | C          | 42.1211333 | 38.6550732 | 41.5465055 |
| H | 44.3627955 | 38.7856815 | 51.4014866 | C          | 43.1565776 | 36.0934551 | 45.5150339 |
| H | 43.4255842 | 37.7544551 | 50.2948192 | C          | 47.3415039 | 39.5301387 | 45.0307296 |
| H | 49.2970231 | 40.5756323 | 44.9793047 | C          | 48.4511506 | 40.4356874 | 44.8248013 |
| H | 48.7003672 | 42.0178207 | 42.8175102 | C          | 48.1326585 | 41.2071730 | 43.7392468 |
| H | 44.5205603 | 42.1672146 | 39.4823080 | C          | 46.8212638 | 40.7756726 | 43.2955259 |
| H | 42.2946101 | 40.7366694 | 39.1556885 | C          | 44.9261831 | 40.8214658 | 41.6951202 |
| H | 40.0171910 | 36.6880224 | 41.8405034 | C          | 44.2843476 | 41.3399988 | 40.5070935 |
| H | 40.6487471 | 35.2861711 | 44.0737019 | C          | 43.1384855 | 40.6121390 | 40.3199083 |

|    |            |            |            |   |            |            |            |
|----|------------|------------|------------|---|------------|------------|------------|
| C  | 43.0921258 | 39.6390115 | 41.3944256 | N | 43.5606222 | 40.1610862 | 45.2079977 |
| C  | 42.0366464 | 37.7332773 | 42.5844417 | H | 42.1566711 | 46.0032525 | 48.7591528 |
| C  | 40.9872795 | 36.7384271 | 42.7149617 | H | 40.3952207 | 45.9191128 | 48.5645646 |
| C  | 41.2755555 | 36.0097029 | 43.8374625 | H | 41.1679886 | 45.0098399 | 49.8704045 |
| C  | 42.4964897 | 36.5758441 | 44.3890724 | C | 46.1293378 | 43.3428403 | 47.7306040 |
| C  | 44.3688333 | 36.5588302 | 46.0183784 | C | 45.6262686 | 42.1011529 | 47.3751201 |
| C  | 45.0361697 | 36.0060771 | 47.1785899 | C | 44.6916925 | 41.4182218 | 48.1868683 |
| C  | 46.2167791 | 36.6865528 | 47.3143883 | C | 44.2760464 | 42.0594115 | 49.3664923 |
| C  | 46.2588223 | 37.6567266 | 46.2388865 | C | 44.7915376 | 43.3041942 | 49.7507001 |
| N  | 46.3573955 | 39.7607257 | 44.1006178 | C | 45.7223559 | 43.9518062 | 48.9297578 |
| N  | 44.1901823 | 39.7826437 | 42.2167373 | O | 46.2914361 | 45.1704576 | 49.2132819 |
| N  | 42.9384757 | 37.6170386 | 43.6119263 | C | 46.0175188 | 45.7889015 | 50.4689070 |
| N  | 45.1202520 | 37.5711064 | 45.4749965 | C | 44.2302051 | 40.0667538 | 47.7814769 |
| H  | 48.1588338 | 38.4928030 | 46.6821946 | C | 43.1950111 | 39.3438937 | 48.6137965 |
| H  | 46.6187702 | 42.0902636 | 41.6346053 | H | 46.8528282 | 43.8560706 | 47.0953000 |
| H  | 41.3536664 | 38.5898206 | 40.7817484 | H | 45.9535959 | 41.6354854 | 46.4435731 |
| H  | 42.7005041 | 35.2609663 | 46.0495074 | H | 43.5464984 | 41.5757588 | 50.0189909 |
| Fe | 44.4939425 | 38.8868154 | 44.0373497 | H | 44.4554604 | 43.7538925 | 50.6853274 |
| C  | 40.7897508 | 42.9286614 | 48.1639185 | H | 44.9492804 | 46.0467462 | 50.5640492 |
| C  | 40.9036593 | 41.8362594 | 47.2994985 | H | 46.3119822 | 45.1468438 | 51.3126978 |
| C  | 41.6931363 | 41.9482554 | 46.1512381 | H | 46.6143377 | 46.7087082 | 50.4997627 |
| C  | 42.3088671 | 43.1651415 | 45.8361778 | H | 45.0875167 | 39.4226911 | 47.5396301 |
| C  | 42.1791548 | 44.2510051 | 46.7021634 | H | 43.8322275 | 40.1422724 | 46.5539713 |
| C  | 41.4343215 | 44.1479488 | 47.8926711 | H | 42.3099292 | 39.9660983 | 48.8098393 |
| C  | 41.2894614 | 45.3288458 | 48.8235242 | H | 43.6082563 | 39.0336725 | 49.5914466 |
| S  | 41.9462354 | 40.5294979 | 45.0616033 | H | 42.8580429 | 38.4357513 | 48.0953863 |
| O  | 41.0963136 | 39.4309590 | 45.5555252 | H | 49.3696795 | 40.4841525 | 45.4096286 |
| O  | 41.7532923 | 41.0010466 | 43.6748138 | H | 48.7696761 | 41.9698767 | 43.2914089 |

|   |            |            |            |   |            |            |            |
|---|------------|------------|------------|---|------------|------------|------------|
| H | 44.6652399 | 42.1571116 | 39.8944640 | C | 46.7279206 | 40.7652548 | 43.0689396 |
| H | 42.4396143 | 40.7580756 | 39.4962890 | C | 44.8273654 | 40.7882992 | 41.4784140 |
| H | 40.1069223 | 36.6547222 | 42.0777554 | C | 44.1686085 | 41.2983679 | 40.2981835 |
| H | 40.7400016 | 35.1592538 | 44.2593459 | C | 43.0112158 | 40.5821834 | 40.1426123 |
| H | 44.6381522 | 35.2110562 | 47.8091380 | C | 42.9754506 | 39.6206522 | 41.2257908 |
| H | 46.9617566 | 36.5631171 | 48.1004159 | C | 41.9337588 | 37.7213720 | 42.4418519 |
| H | 49.0193024 | 36.8992950 | 42.3098787 | C | 40.8863062 | 36.7268174 | 42.5902431 |
| H | 47.7948936 | 35.5276255 | 42.3613707 | C | 41.1921308 | 36.0016561 | 43.7103732 |
| H | 40.1723674 | 42.8152188 | 49.0550052 | C | 42.4214572 | 36.5679846 | 44.2417435 |
| H | 40.3608180 | 40.9182325 | 47.5244812 | C | 44.2534477 | 36.6367488 | 45.9141543 |
| H | 42.8904550 | 43.2595703 | 44.9191687 | C | 44.9086469 | 36.1322859 | 47.1009678 |
| H | 42.6758090 | 45.1874657 | 46.4483068 | C | 46.0464867 | 36.8777359 | 47.2696210 |

## IM

|   |            |            |            |    |            |            |            |
|---|------------|------------|------------|----|------------|------------|------------|
| C | 47.9877441 | 36.5969968 | 42.5408913 | C  | 46.0816730 | 37.8314899 | 46.1825110 |
| H | 47.8079178 | 36.7893914 | 43.6139292 | N  | 46.2412763 | 39.8011914 | 43.9204045 |
| C | 46.9997719 | 37.4254625 | 41.7327962 | N  | 44.0960106 | 39.7566940 | 42.0208273 |
| H | 47.2255023 | 38.4944554 | 41.8834011 | N  | 42.8536843 | 37.6045280 | 43.4519122 |
| H | 47.1121951 | 37.2127711 | 40.6540163 | N  | 44.9714763 | 37.6827650 | 45.3833203 |
| O | 45.6486603 | 37.1500184 | 42.1299176 | H  | 47.9627542 | 38.6988732 | 46.6312306 |
| H | 45.0585118 | 37.6830498 | 41.5771947 | H  | 46.5278518 | 42.0463762 | 41.3810834 |
| C | 47.1225209 | 38.7220570 | 45.9413178 | H  | 41.2070786 | 38.5937605 | 40.6666956 |
| C | 46.0529131 | 41.2487092 | 41.9516250 | H  | 42.6427286 | 35.2640398 | 45.9064783 |
| C | 41.9974489 | 38.6488017 | 41.4072158 | Fe | 44.4018317 | 38.8980060 | 43.8439988 |
| C | 43.0806030 | 36.1100338 | 45.3778951 | C  | 40.8182996 | 42.7389023 | 48.0591958 |
| C | 47.2094047 | 39.6093939 | 44.8754140 | C  | 40.9956678 | 41.8542024 | 46.9945731 |
| C | 48.3527374 | 40.4564995 | 44.6095859 | C  | 41.7549134 | 42.2466281 | 45.8835955 |
| C | 48.0558791 | 41.1768125 | 43.4839676 | C  | 42.2892064 | 43.5366680 | 45.8224062 |
|   |            |            |            | C  | 42.1010585 | 44.4155911 | 46.8937812 |
|   |            |            |            | C  | 41.3736093 | 44.0333265 | 48.0341489 |

|   |            |            |            |            |            |            |            |
|---|------------|------------|------------|------------|------------|------------|------------|
| C | 41.1570398 | 44.9849073 | 49.1893804 | H          | 43.6727376 | 37.8078553 | 50.1739286 |
| S | 42.0252140 | 41.0859348 | 44.5208853 | H          | 42.4796070 | 39.0421072 | 50.5512846 |
| O | 40.8216408 | 40.2419654 | 44.4364025 | H          | 49.2897125 | 40.4700608 | 45.1663271 |
| O | 42.4423244 | 41.8667215 | 43.3433472 | H          | 48.7077119 | 41.8984817 | 42.9916520 |
| N | 43.3325656 | 40.1674557 | 44.9982592 | H          | 44.5439249 | 42.1065308 | 39.6704276 |
| H | 41.6208888 | 45.9648420 | 49.0036299 | H          | 42.2993377 | 40.7207792 | 39.3289244 |
| H | 40.0824411 | 45.1521976 | 49.3705923 | H          | 39.9975394 | 36.6367757 | 41.9657007 |
| H | 41.5819734 | 44.5769911 | 50.1226428 | H          | 40.6530702 | 35.1658402 | 44.1563470 |
| C | 45.5425470 | 43.0218519 | 48.2781070 | H          | 44.5423177 | 35.3215010 | 47.7306487 |
| C | 45.0348516 | 41.7384207 | 48.2092739 | H          | 46.7759283 | 36.7823937 | 48.0739169 |
| C | 44.5803412 | 41.0467080 | 49.3781567 | H          | 49.0038341 | 36.9133194 | 42.3051620 |
| C | 44.6468329 | 41.7674654 | 50.6060532 | H          | 47.7844958 | 35.5422973 | 42.3555101 |
| C | 45.1383133 | 43.0704686 | 50.6736290 | H          | 40.2152040 | 42.4125761 | 48.9064584 |
| C | 45.6059636 | 43.7018874 | 49.5102721 | H          | 40.5081334 | 40.8795560 | 47.0155967 |
| O | 46.1496258 | 44.9632096 | 49.4772900 | H          | 42.8314373 | 43.8681961 | 44.9368884 |
| C | 46.1852864 | 45.7278215 | 50.6784691 | H          | 42.5300494 | 45.4155119 | 46.8290331 |
| C | 44.0977916 | 39.7170095 | 49.2751972 |            |            |            |            |
| C | 43.5641416 | 38.8816872 | 50.3926814 | <b>TS2</b> |            |            |            |
| H | 45.9067722 | 43.5305739 | 47.3833803 | C          | 48.0007614 | 36.5657669 | 42.5661899 |
| H | 44.9675374 | 41.2424780 | 47.2369250 | H          | 47.8293087 | 36.7295909 | 43.6455308 |
| H | 44.3027050 | 41.2938820 | 51.5275064 | C          | 46.9867100 | 37.3981659 | 41.7932537 |
| H | 45.1617966 | 43.5815178 | 51.6368880 | H          | 47.1844197 | 38.4653030 | 41.9915259 |
| H | 45.1690789 | 45.9287400 | 51.0571668 | H          | 47.1058911 | 37.2350596 | 40.7050592 |
| H | 46.7646508 | 45.2255480 | 51.4675013 | O          | 45.6477345 | 37.0664772 | 42.1797496 |
| H | 46.6718066 | 46.6788560 | 50.4269460 | H          | 45.0445385 | 37.6937837 | 41.7526167 |
| H | 44.0693556 | 39.2824621 | 48.2708370 | C          | 47.2208690 | 38.5468830 | 46.1137710 |
| H | 43.0507314 | 39.6937844 | 45.8631512 | C          | 46.0603291 | 41.1778247 | 42.2153017 |
| H | 44.0587995 | 39.0866374 | 51.3573825 | C          | 42.0207300 | 38.5708085 | 41.6382646 |

|    |            |            |            |   |            |            |            |
|----|------------|------------|------------|---|------------|------------|------------|
| C  | 43.1504433 | 35.9739454 | 45.5639323 | C | 41.7626141 | 42.2809027 | 46.1861488 |
| C  | 47.2615970 | 39.5012038 | 45.1023260 | C | 42.3404585 | 43.5529534 | 46.2590511 |
| C  | 48.3821830 | 40.3884938 | 44.8592722 | C | 42.0029390 | 44.4108254 | 47.3100027 |
| C  | 48.0600690 | 41.1307949 | 43.7551773 | C | 41.0936961 | 44.0209301 | 48.3083150 |
| C  | 46.7363634 | 40.7015833 | 43.3366898 | C | 40.7476452 | 44.9470346 | 49.4522243 |
| C  | 44.8418583 | 40.7135904 | 41.7225541 | S | 42.1876520 | 41.1702587 | 44.8156993 |
| C  | 44.1942736 | 41.2273281 | 40.5348392 | O | 40.9419390 | 40.4861803 | 44.4270809 |
| C  | 43.0362857 | 40.5132904 | 40.3680687 | O | 42.9167371 | 41.9806864 | 43.8278255 |
| C  | 42.9937040 | 39.5515038 | 41.4562362 | N | 43.2491039 | 40.0178923 | 45.4270716 |
| C  | 41.9633679 | 37.6372573 | 42.6700783 | H | 40.8575448 | 46.0036774 | 49.1667816 |
| C  | 40.9371296 | 36.6129037 | 42.7899063 | H | 39.7137783 | 44.8000858 | 49.7998116 |
| C  | 41.2523563 | 35.8711717 | 43.8959318 | H | 41.4115543 | 44.7720087 | 50.3188971 |
| C  | 42.4694976 | 36.4554462 | 44.4471654 | C | 46.2089038 | 43.4356564 | 47.7247998 |
| C  | 44.3463504 | 36.4710924 | 46.0882706 | C | 45.7006125 | 42.2068607 | 47.3519911 |
| C  | 45.0235697 | 35.9246735 | 47.2460754 | C | 44.6970057 | 41.5536065 | 48.1208686 |
| C  | 46.1803103 | 36.6443175 | 47.4011459 | C | 44.2235268 | 42.2255003 | 49.2765245 |
| C  | 46.1982046 | 37.6267369 | 46.3368895 | C | 44.7509749 | 43.4504777 | 49.6761001 |
| N  | 46.2676912 | 39.7172498 | 44.1769693 | C | 45.7482065 | 44.0642436 | 48.8992689 |
| N  | 44.1047774 | 39.6885764 | 42.2599786 | O | 46.3261078 | 45.2619252 | 49.2056465 |
| N  | 42.8742614 | 37.5271046 | 43.6899071 | C | 46.0139860 | 45.8952306 | 50.4488002 |
| N  | 45.0651351 | 37.5177068 | 45.5669773 | C | 44.2658567 | 40.2444306 | 47.7485436 |
| H  | 48.0837189 | 38.5003223 | 46.7748768 | C | 43.2603010 | 39.4671996 | 48.5295770 |
| H  | 46.5367651 | 41.9749200 | 41.6453027 | H | 46.9790959 | 43.9287070 | 47.1298614 |
| H  | 41.2362305 | 38.5056916 | 40.8907198 | H | 46.0678496 | 41.7174094 | 46.4482660 |
| H  | 42.7246365 | 35.1110202 | 46.0764798 | H | 43.4431547 | 41.7690804 | 49.8876904 |
| Fe | 44.4611324 | 38.7672957 | 44.0612517 | H | 44.3771069 | 43.9221771 | 50.5847198 |
| C  | 40.5107895 | 42.7437559 | 48.2054745 | H | 44.9492264 | 46.1750310 | 50.4953643 |
| C  | 40.8252221 | 41.8833761 | 47.1493953 | H | 46.2629784 | 45.2499041 | 51.3038066 |



|           |            |            |            |   |            |            |            |
|-----------|------------|------------|------------|---|------------|------------|------------|
| H         | 46.6293161 | 46.8012311 | 50.4956179 | H | 45.0928453 | 37.6356245 | 41.5315828 |
| H         | 44.9106689 | 39.6999059 | 47.0686202 | C | 47.3500469 | 38.5607138 | 45.9651092 |
| H         | 42.6278863 | 39.3341464 | 45.8736658 | C | 46.2041208 | 41.2354242 | 42.0941146 |
| H         | 43.6576255 | 39.2156630 | 49.5324896 | C | 42.1282846 | 38.6733276 | 41.5268068 |
| H         | 43.0192455 | 38.5153737 | 48.0384012 | C | 43.2121209 | 36.0855439 | 45.4690466 |
| H         | 42.3304925 | 40.0356471 | 48.6927319 | C | 47.4084885 | 39.5143948 | 44.9521934 |
| H         | 49.3141288 | 40.4329118 | 45.4228068 | C | 48.5155093 | 40.4282828 | 44.7469300 |
| H         | 48.7038893 | 41.8697064 | 43.2781319 | C | 48.1965191 | 41.1866915 | 43.6531610 |
| H         | 44.5762678 | 42.0407089 | 39.9179444 | C | 46.8898797 | 40.7349875 | 43.2017744 |
| H         | 42.3345755 | 40.6561868 | 39.5463323 | C | 44.9678854 | 40.7983211 | 41.6137316 |
| H         | 40.0628814 | 36.5163274 | 42.1461437 | C | 44.3066668 | 41.3372433 | 40.4401750 |
| H         | 40.7377569 | 35.0062836 | 44.3145284 | C | 43.1419370 | 40.6333068 | 40.2764497 |
| H         | 44.6511595 | 35.1048173 | 47.8602524 | C | 43.1054292 | 39.6536856 | 41.3520730 |
| H         | 46.9388385 | 36.5200644 | 48.1739740 | C | 42.0578127 | 37.7367927 | 42.5572467 |
| H         | 49.0105216 | 36.9003101 | 42.3284244 | C | 40.9954631 | 36.7517457 | 42.7024526 |
| H         | 47.8101566 | 35.5128068 | 42.3587967 | C | 41.2994067 | 36.0140017 | 43.8142885 |
| H         | 39.7700081 | 42.4165195 | 48.9350130 | C | 42.5429564 | 36.5629961 | 44.3425480 |
| H         | 40.3065750 | 40.9284224 | 47.0649223 | C | 44.4240286 | 36.5587776 | 45.9792476 |
| H         | 43.0365584 | 43.8867894 | 45.4895931 | C | 45.0815770 | 36.0271593 | 47.1585742 |
| H         | 42.4583227 | 45.4006608 | 47.3403124 | C | 46.2589633 | 36.7142685 | 47.2949226 |
|           |            |            |            | C | 46.3074726 | 37.6667530 | 46.2007580 |
| <b>PC</b> |            |            |            | N | 46.4344926 | 39.7188071 | 44.0070626 |
| C         | 48.0292580 | 36.5758022 | 42.5108492 | N | 44.2212334 | 39.7782430 | 42.1511586 |
| H         | 47.8458310 | 36.7646489 | 43.5834729 | N | 42.9831929 | 37.6010610 | 43.5610679 |
| C         | 47.0434476 | 37.4054540 | 41.7017730 | N | 45.1767555 | 37.5633432 | 45.4259114 |
| H         | 47.2613034 | 38.4752435 | 41.8566645 | H | 48.2069378 | 38.5088176 | 46.6335730 |
| H         | 47.1538704 | 37.1936972 | 40.6230509 | H | 46.6817131 | 42.0380497 | 41.5317302 |
| O         | 45.6902101 | 37.1250293 | 42.0975964 | H | 41.3430366 | 38.6189363 | 40.7784263 |

H 42.7576364 35.2530872 46.0070128  
Fe 44.6876332 38.6886023 43.8132890  
C 40.6045902 43.1279541 48.6406973  
C 40.9129317 41.9608443 47.9459827  
C 41.9309229 41.9865630 46.9863338  
C 42.5667691 43.1834588 46.6524566  
C 42.2340746 44.3500972 47.3465614  
C 41.2831096 44.3340942 48.3830528  
C 41.0302888 45.5599348 49.2251128  
S 42.4531455 40.4199943 46.2820455  
O 41.3064424 39.7015609 45.7216738  
O 43.6448793 40.6361763 45.4298855  
N 42.8239397 39.5525224 47.6845222  
H 40.9791467 46.4756491 48.6185252  
H 40.0979338 45.4780641 49.8007691  
H 41.8543603 45.7021875 49.9474101  
C 45.9989153 42.9204440 47.9963638  
C 45.4752778 41.6478112 47.7944997  
C 44.5787998 41.0665960 48.7107190  
C 44.2328952 41.8164658 49.8412258  
C 44.7578237 43.0961635 50.0669625  
C 45.6457118 43.6540575 49.1384127  
O 46.2185673 44.8965798 49.2685652  
C 46.0161235 45.6302703 50.4753282  
C 44.0827386 39.6418119 48.4683811  
C 43.8157438 38.8540505 49.7573390  
H 46.6971041 43.3545212 47.2781118  
H 45.7599199 41.0934974 46.8982165

H 43.5394814 41.4063166 50.5774142  
H 44.4650963 43.6415820 50.9645655  
H 44.9570741 45.9143563 50.5995272  
H 46.3446872 45.0640120 51.3598783  
H 46.6230769 46.5408509 50.3933161  
H 44.8869724 39.1319470 47.9128416  
H 42.5714439 38.5848267 47.4782388  
H 44.6840463 38.8973224 50.4297313  
H 43.6091084 37.7961886 49.5311992  
H 42.9382067 39.2496298 50.2898638  
H 49.4329927 40.4777319 45.3333139  
H 48.8259028 41.9564156 43.2065425  
H 44.6892872 42.1479701 39.8201824  
H 42.4311655 40.7874951 39.4646018  
H 40.1026459 36.6807637 42.0812393  
H 40.7609211 35.1712487 44.2477257  
H 44.6800195 35.2416275 47.7986981  
H 47.0023470 36.5995736 48.0837781  
H 49.0442050 36.8988106 42.2792992  
H 47.8260889 35.5220881 42.3198620  
H 39.8202120 43.0848144 49.3963142  
H 40.3764529 41.0405908 48.1770480  
H 43.3366994 43.1980228 45.8810537  
H 42.7498149 45.2769076 47.0953613

QM coordinates of the Iron Nitrenoid  
formation reaction

**RC**

|   |            |            |            |    |            |            |            |
|---|------------|------------|------------|----|------------|------------|------------|
| C | 39.3718339 | 43.7272379 | 49.2393556 | N  | 40.8789203 | 42.7466867 | 44.5650792 |
| H | 40.3203274 | 43.1852408 | 49.3669217 | N  | 42.9118052 | 44.3825257 | 45.7509014 |
| C | 39.0026083 | 43.7369775 | 47.7600058 | N  | 42.7861003 | 42.7970153 | 48.1585177 |
| H | 38.8055997 | 42.7029680 | 47.4272252 | Fe | 41.8606855 | 42.7501788 | 46.3544034 |
| H | 38.0849777 | 44.3279889 | 47.5930194 | C  | 47.8389465 | 38.8168449 | 43.5256864 |
| O | 40.0700264 | 44.2998340 | 46.9865661 | C  | 47.2870144 | 39.6879126 | 44.4638149 |
| H | 39.8333886 | 44.2742708 | 46.0468709 | C  | 46.1146349 | 39.3104129 | 45.1306778 |
| C | 41.7578391 | 40.8212319 | 49.1576726 | C  | 45.4856231 | 38.0847474 | 44.8691850 |
| C | 39.3752944 | 40.8594978 | 44.9598255 | C  | 46.0577244 | 37.2296371 | 43.9255845 |
| C | 42.0559165 | 44.5822089 | 43.4656203 | C  | 47.2421109 | 37.5750093 | 43.2402192 |
| C | 44.1592821 | 44.7970469 | 47.8119763 | C  | 47.8679648 | 36.6353113 | 42.2438108 |
| C | 40.9082516 | 40.4382119 | 48.1209076 | S  | 45.3810469 | 40.4489396 | 46.2832055 |
| C | 39.9823177 | 39.3135314 | 48.1539667 | O  | 44.6227036 | 39.7580278 | 47.3157229 |
| C | 39.3205505 | 39.3073980 | 46.9563649 | O  | 46.3565275 | 41.4944970 | 46.6154330 |
| C | 39.8401998 | 40.4488772 | 46.2112403 | N  | 44.1180785 | 41.2446300 | 45.3257397 |
| C | 39.8454683 | 41.9218109 | 44.1866571 | N  | 44.5398637 | 41.8518370 | 44.3268860 |
| C | 39.3570752 | 42.2780473 | 42.8616073 | N  | 44.8337730 | 42.4246930 | 43.3964664 |
| C | 40.1338968 | 43.3154774 | 42.4186427 | H  | 45.5730610 | 36.2736740 | 43.7053290 |
| C | 41.0857139 | 43.5824166 | 43.4883201 | H  | 44.5701538 | 37.8093279 | 45.3985767 |
| C | 42.8867328 | 44.9795082 | 44.5151414 | H  | 47.7670260 | 40.6426984 | 44.6769529 |
| C | 43.7697776 | 46.1329762 | 44.4849963 | H  | 48.7500591 | 39.1179391 | 43.0025026 |
| C | 44.2920627 | 46.2629975 | 45.7442451 | H  | 48.6938721 | 36.0705120 | 42.7111487 |
| C | 43.7767509 | 45.1338458 | 46.5124103 | H  | 47.1444991 | 35.8999990 | 41.8677749 |
| C | 43.7198650 | 43.7127065 | 48.5773844 | H  | 48.3018320 | 37.1703702 | 41.3864205 |
| C | 44.1507985 | 43.4135422 | 49.9345659 | H  | 41.7570380 | 40.1848369 | 50.0425839 |
| C | 43.4406623 | 42.3113612 | 50.3355455 | H  | 38.5689867 | 40.2693599 | 44.5243117 |
| C | 42.6151306 | 41.9232067 | 49.2020738 | H  | 42.1574251 | 45.1423609 | 42.5361081 |
| N | 40.8076282 | 41.1109916 | 46.9271138 | H  | 44.9105792 | 45.4423446 | 48.2671803 |

|           |            |            |            |    |            |            |            |
|-----------|------------|------------|------------|----|------------|------------|------------|
| H         | 39.8055583 | 38.6752109 | 49.0196284 | C  | 39.5088353 | 42.2562170 | 42.8245958 |
| H         | 38.5857987 | 38.5920351 | 46.5869561 | C  | 40.2400297 | 43.3338783 | 42.3970525 |
| H         | 38.5464771 | 41.7627690 | 42.3463538 | C  | 41.1884393 | 43.6156580 | 43.4589859 |
| H         | 40.0819742 | 43.8835677 | 41.4898560 | C  | 42.9378853 | 45.0473597 | 44.5115621 |
| H         | 43.9244236 | 46.7843963 | 43.6248779 | C  | 43.8003916 | 46.2121250 | 44.4977579 |
| H         | 44.9254723 | 47.0744384 | 46.1026067 | C  | 44.3692104 | 46.2976502 | 45.7414407 |
| H         | 44.9371895 | 43.9345119 | 50.4806858 | C  | 43.8955860 | 45.1366655 | 46.4822145 |
| H         | 43.4547488 | 41.8269759 | 51.3118854 | C  | 43.8497391 | 43.7091546 | 48.5359881 |
| H         | 38.6201914 | 43.1903037 | 49.8179767 | C  | 44.2589172 | 43.4333253 | 49.9021637 |
| H         | 39.5258869 | 44.7552962 | 49.5671223 | C  | 43.4982036 | 42.3762882 | 50.3326072 |
|           |            |            |            | C  | 42.6725006 | 41.9826565 | 49.2040998 |
| <b>TS</b> |            |            |            | N  | 40.9731567 | 41.0913635 | 46.8894443 |
| C         | 39.4836579 | 43.6646877 | 49.1781055 | N  | 41.0420450 | 42.7337113 | 44.5139362 |
| H         | 40.4179256 | 43.1312452 | 49.4026752 | N  | 43.0094238 | 44.4065828 | 45.7248448 |
| C         | 39.2206073 | 43.5974593 | 47.6793999 | N  | 42.8886534 | 42.8134884 | 48.1343198 |
| H         | 38.9761492 | 42.5623919 | 47.3890036 | Fe | 42.1208182 | 42.6414754 | 46.2675948 |
| H         | 38.3663403 | 44.2403026 | 47.4019998 | C  | 47.4066574 | 38.9939598 | 43.9775142 |
| O         | 40.3772189 | 44.0408928 | 46.9416445 | C  | 46.8088644 | 39.9069465 | 44.8456869 |
| H         | 40.1328928 | 44.1362522 | 46.0070937 | C  | 45.5543270 | 39.6120471 | 45.3896565 |
| C         | 41.7975805 | 40.8990873 | 49.1777310 | C  | 44.9020370 | 38.4107994 | 45.0904100 |
| C         | 39.5845156 | 40.8075113 | 44.8952429 | C  | 45.5204821 | 37.5044694 | 44.2237342 |
| C         | 42.0943489 | 44.6691949 | 43.4690155 | C  | 46.7785244 | 37.7776829 | 43.6496827 |
| C         | 44.3113793 | 44.7719508 | 47.7620147 | C  | 47.4491030 | 36.7876412 | 42.7313570 |
| C         | 41.0109908 | 40.4708587 | 48.1132097 | S  | 44.7885717 | 40.7721814 | 46.5262259 |
| C         | 40.0782540 | 39.3560496 | 48.1462865 | O  | 44.0786317 | 40.0083688 | 47.5612534 |
| C         | 39.4667031 | 39.3070244 | 46.9227178 | O  | 45.8163576 | 41.7488012 | 46.9344309 |
| C         | 40.0253542 | 40.4131032 | 46.1567499 | N  | 43.5620964 | 41.5690638 | 45.6001993 |
| C         | 40.0307707 | 41.8811620 | 44.1270983 | N  | 44.3000276 | 41.8351238 | 44.2051843 |

|           |            |            |            |    |            |            |            |
|-----------|------------|------------|------------|----|------------|------------|------------|
| N         | 43.8777305 | 42.2358394 | 43.2290339 | H  | 38.2264879 | 44.3341491 | 47.5217976 |
| H         | 45.0153619 | 36.5647492 | 43.9810368 | O  | 40.2467462 | 44.2830815 | 47.0297264 |
| H         | 43.9319718 | 38.1845118 | 45.5377540 | H  | 40.0917775 | 44.1819186 | 46.0783751 |
| H         | 47.3132121 | 40.8370284 | 45.1060828 | C  | 41.8546793 | 40.8956643 | 49.2765967 |
| H         | 48.3805010 | 39.2381648 | 43.5434636 | C  | 39.5703278 | 40.8554081 | 45.0268252 |
| H         | 46.7571557 | 35.9954705 | 42.4141940 | C  | 42.3435837 | 44.5019270 | 43.5257561 |
| H         | 47.8620224 | 37.2729031 | 41.8330044 | C  | 44.2989078 | 44.8358397 | 47.9308969 |
| H         | 48.2997310 | 36.3014276 | 43.2398025 | C  | 41.0367136 | 40.4945687 | 48.2255485 |
| H         | 41.7563488 | 40.2966688 | 50.0851774 | C  | 40.0996220 | 39.3856351 | 48.2622112 |
| H         | 38.7746292 | 40.2188760 | 44.4643605 | C  | 39.4622511 | 39.3538440 | 47.0500499 |
| H         | 42.1537878 | 45.2739520 | 42.5641382 | C  | 40.0076027 | 40.4633817 | 46.2881642 |
| H         | 45.1134032 | 45.3717761 | 48.1921710 | C  | 40.0731953 | 41.8924653 | 44.2469162 |
| H         | 39.8749154 | 38.7362179 | 49.0195157 | C  | 39.6289327 | 42.2246284 | 42.9074065 |
| H         | 38.7296371 | 38.5858134 | 46.5696519 | C  | 40.4460584 | 43.2292210 | 42.4563212 |
| H         | 38.7053187 | 41.7332005 | 42.3060575 | C  | 41.3716042 | 43.5090821 | 43.5390560 |
| H         | 40.1671462 | 43.8864010 | 41.4603168 | C  | 43.1084824 | 44.9429447 | 44.6025049 |
| H         | 43.8976695 | 46.9138688 | 43.6694103 | C  | 43.9302756 | 46.1353213 | 44.5959401 |
| H         | 44.9912620 | 47.1142751 | 46.1078323 | C  | 44.4007574 | 46.3015018 | 45.8730204 |
| H         | 45.0653172 | 43.9506651 | 50.4219191 | C  | 43.9205687 | 45.1582197 | 46.6303602 |
| H         | 43.4990457 | 41.8919954 | 51.3090943 | C  | 43.8499318 | 43.7596946 | 48.6900941 |
| H         | 38.7032793 | 43.1540449 | 49.7423043 | C  | 44.2629513 | 43.4674398 | 50.0496205 |
| H         | 39.6184150 | 44.7069448 | 49.4672554 | C  | 43.5308047 | 42.3808873 | 50.4529290 |
|           |            |            |            | C  | 42.7142268 | 41.9906376 | 49.3172467 |
| <b>IM</b> |            |            |            | N  | 40.9717427 | 41.1321842 | 47.0109272 |
| C         | 39.4228362 | 43.7532046 | 49.2442348 | N  | 41.1103736 | 42.7130847 | 44.6358097 |
| H         | 40.3699919 | 43.2233310 | 49.4246534 | N  | 43.1049005 | 44.3695323 | 45.8501443 |
| C         | 39.1326619 | 43.7417482 | 47.7469898 | N  | 42.9071582 | 42.8527072 | 48.2690955 |
| H         | 38.9428905 | 42.7032410 | 47.4240683 | Fe | 42.2394517 | 42.5898429 | 46.3568665 |

|   |            |            |            |   |            |            |            |
|---|------------|------------|------------|---|------------|------------|------------|
| C | 47.5024977 | 39.0313511 | 43.8730008 | H | 44.0639702 | 46.8024405 | 43.7443858 |
| C | 46.9055393 | 39.9118843 | 44.7781509 | H | 44.9789886 | 47.1483620 | 46.2425387 |
| C | 45.6910023 | 39.5644074 | 45.3765131 | H | 45.0566308 | 43.9935523 | 50.5800407 |
| C | 45.0710551 | 38.3437569 | 45.0765753 | H | 43.5269124 | 41.8867847 | 51.4244816 |
| C | 45.6858757 | 37.4714091 | 44.1754472 | H | 38.6577694 | 43.2192609 | 49.8078340 |
| C | 46.9126564 | 37.7938110 | 43.5598544 | H | 39.5571850 | 44.7871190 | 49.5621004 |
| C | 47.5888430 | 36.8257057 | 42.6209271 |   |            |            |            |
| S | 44.9060219 | 40.6899320 | 46.5322249 |   |            |            |            |
| O | 44.3398554 | 39.8694939 | 47.6288923 |   |            |            |            |
| O | 45.8972030 | 41.7400324 | 46.8650045 |   |            |            |            |
| N | 43.6435654 | 41.3726595 | 45.7623537 |   |            |            |            |
| N | 43.4846278 | 41.8079770 | 40.9702545 |   |            |            |            |
| N | 43.4854045 | 40.9406433 | 40.2931952 |   |            |            |            |
| H | 45.2053835 | 36.5167798 | 43.9396895 |   |            |            |            |
| H | 44.1225752 | 38.0779320 | 45.5495856 |   |            |            |            |
| H | 47.3866337 | 40.8565535 | 45.0305237 |   |            |            |            |
| H | 48.4481570 | 39.3185441 | 43.4044882 |   |            |            |            |
| H | 46.8879556 | 36.0651806 | 42.2483973 |   |            |            |            |
| H | 48.0471463 | 37.3316673 | 41.7575350 |   |            |            |            |
| H | 48.4041367 | 36.2901170 | 43.1385379 |   |            |            |            |
| H | 41.8395720 | 40.2688301 | 50.1681783 |   |            |            |            |
| H | 38.7521831 | 40.2803689 | 44.5931936 |   |            |            |            |
| H | 42.4954692 | 45.0337864 | 42.5865418 |   |            |            |            |
| H | 45.0663585 | 45.4650365 | 48.3816717 |   |            |            |            |
| H | 39.9056398 | 38.7567822 | 49.1311082 |   |            |            |            |
| H | 38.7322350 | 38.6278011 | 46.6922715 |   |            |            |            |
| H | 38.8258062 | 41.7143225 | 42.3757648 |   |            |            |            |
| H | 40.4226878 | 43.7554152 | 41.5020463 |   |            |            |            |
